# Supplementary material
Source: PubMed Central journal article supplement (PMC2169296)
Supplement: NIHMS34286-supplement-01.pdf [file NIHMS34286-supplement-01.pdf]

## Supplemental Data

### Genes Induced Late in Infection

### Increase Fitness of *Vibrio cholerae* after Release into the Environment

Stefan Schild, Rita Tamayo, Eric J. Nelson, Firdausi Qadri, Stephen B. Calderwood, and Andrew Camilli

#### Supplemental Experimental Procedures

##### Reagents.

Bacterial strains and plasmids are listed in Table S1. *V. cholerae* AC53 was used as a wildtype strain. For genetic manipulations *E. coli* strains DH5 $\alpha$ , DH5 $\alpha$  $\lambda$ pir and SM10 $\lambda$ pir were used. Unless stated otherwise, bacteria were grown in LB at 37°C with aeration. M9 was prepared using Difco™ M9 Minimal Salts according to the instructions. Supplements were used in the following final concentrations: streptomycin (Sm, 100 $\mu$ g/ml), Kn (50 $\mu$ g/ml), ampicillin (Ap, 50 $\mu$ g/ml in combination with other antibiotics or 100 $\mu$ g/ml), Gly (0.5%), Glc (0.2%), GlcNAc (0.2%), crab shell chitin (1%), succinate (0.2%), 5-bromo-4-chloro-3-indolyl- $\beta$ -D-galactopyranoside (X-Gal, 40 $\mu$ g/ml), isopropyl- $\beta$ -D-thiogalactopyranoside (IPTG, 0.5mM) and betaine monohydrate (betaine, 50mM).

##### DNA manipulations and strains constructions

##### Polymerase chain reaction (PCR), DNA Purification, DNA Sequencing.

Chromosomal DNA was prepared using the DNeasy® Tissue Kit, whereas PCR products or digested plasmid DNA were purified using the Qiaquick® Gel extraction Kit or Qiaquick® PCR Purification Kit (Qiagen). PCRs for sequencing and subcloning were carried out using the Easy-A® High-Fidelity PCR Cloning enzyme (Stratagene), for all other reaction the Taq DNA Polymerase (NEB) was used. Automated DNA sequencing was performed with an automated ABI 3130XL DNA sequencer at the Tufts University Core Facility.

### **Construction of suicide plasmids and mutant strains.**

All suicide plasmids using pCVD442 to generate in-frame deletions were constructed in a similar manner. PCR fragments of ~800bp upstream and downstream of each deletion were generated using the oligonucleotide pairs x-y-up and x-y-down, in which x stands for the gene and y for the restriction site/enzyme used (Table S1). Purified PCR fragments were treated with the respective restriction enzymes and ligated into a SacI/XbaI-digested pCVD442. After transformation of the ligation mix into DH5 $\alpha$ pir, Ap<sup>R</sup> colonies were characterized by PCR and/or restriction analysis (data not shown).

The plasmid pGPVC1593-VC2370-VC2697 was generated by amplifying three PCR fragments using the oligonucleotide pairs VC1593-SacI-up/ VC1593-3'-KpnI, VC2370-5'-KpnI/ VC2370-3'-EcoRI and VC2697-5'-EcoRI/ VC2697-3'-XbaI. The purified PCR fragments were treated with the respective restriction enzymes indicated by the name of the oligonucleotide, ligated into pGP704 digested with SacI/ XbaI and transformed into DH5 $\alpha$ pir. Ap<sup>R</sup> colonies were characterized by PCR and/ or restriction analysis (data not shown).

Once the right construct was identified the suicide plasmid was transformed into SM10 $\lambda$ pir to allow conjugation into *V. cholerae*, which was achieved by crosstreaking O/N colonies of recipient and donor on a LB plate and incubation at 37°C for ~6h. Transfer into *V. cholerae* and integration on the chromosome was selected by isolating Sm<sup>R</sup>/Ap<sup>R</sup> colonies. In the case of pCVD442 derivatives after one passage of LB in the absence of antibiotics sucrose selection was used to obtain Ap<sup>S</sup> colonies. Correct insertions or chromosomal deletions were confirmed by PCR (data not shown).

### **Construction of expression plasmids.**

All expression plasmids using pMMB67EH were constructed in a similar manner. PCR fragments including the Shine Dalgarno sequence of the respective gene were generated using the oligonucleotide pairs x-5'-y and x-3'-y, in which x stands for the gene and y for the restriction site/enzyme used (Table S1). Purified PCR fragments were treated with the respective restriction enzymes and ligated into an appropriate digested pMMB67EH. After transformation of the ligation mix into DH5 $\alpha$ , Ap<sup>R</sup> colonies were characterized by PCR and/or restriction analysis (data not shown).

### **Construction of *V. cholerae* transcriptional fusion library.**

The library of transcriptional *tnpR* fusions in AC53 was generated essentially as described (Osorio et al., 2005). First, pRes and pRes1 were mobilized into AC53 by conjugation, followed by allelic exchange to generate strains AC53res and AC53res1. Second, the library of random *tnpR* fusions designated as pIVET5nlibrary was conjugated into AC53res and AC53res1 by 24 independent matings. Unresolved strains were isolated by selection for Ap<sup>R</sup>, Kn<sup>R</sup> and Sm<sup>R</sup> colonies. By combining ~1000 colonies from each mating, 12 library pools were generated.

### **Fusion strain reconstructions and quantification of resolution.**

Unresolved *V. cholerae* fusion strains were reconstructed as described (Osorio et al., 2005). To quantify resolution, strains were first grown on LB-Sm/Kn/Ap plates O/N and diluted in LB to OD<sub>600</sub>=0.002. To determine the *in vitro* resolution, 2ml were incubated for 8h, whereas the *in vivo* resolution at different time points was determined by intragastrically inoculating anesthetized 5-day-old CD-1 mice with 50µl. Mice were euthanized at 5, 7 or 24h post-infection, and *V. cholerae* were recovered as described above. The amount of resolution *in vitro* and *in vivo* was determined by plating appropriate dilutions on LB-Sm/Kn and LB-Sm/Ap plates. Results were expressed as % resolution, calculated as the Sm<sup>R</sup>/Kn<sup>S</sup> CFU [Sm<sup>R</sup>/Ap<sup>R</sup> CFU minus Sm<sup>R</sup>/Kn<sup>R</sup> CFU] divided by Sm<sup>R</sup>/Ap<sup>R</sup> CFU.

**Table S1. Bacterial strains and plasmids used in this study**

| strain or plasmid                                 | relevant genotype/ resistance                                                                                                                               | source                                     |
|---------------------------------------------------|-------------------------------------------------------------------------------------------------------------------------------------------------------------|--------------------------------------------|
| <i>E. coli</i> strains                            |                                                                                                                                                             |                                            |
| DH5 $\alpha$                                      | F- $\Delta$ ( <i>lacZYA-argF</i> ) <i>U169 recA1 endA1 hsdR17 supE44 thi-1 gyrA96 relA1</i>                                                                 | (Kolter et al., 1978)<br>(Hanahan, 1983)   |
| DH5 $\alpha$ pir                                  | F- $\Delta$ ( <i>lacZYA-argF</i> ) <i>U169 recA1 endA1 hsdR17 supE44 thi-1 gyrA96 relA1 <math>\lambda</math>::pir</i>                                       | (Kolter et al., 1978)<br>(Hanahan, 1983)   |
| SM10 $\lambda$ pir                                | <i>thi recA thr leu tonA lacY supE RP4-2-Tc::Mu <math>\lambda</math>::pir</i>                                                                               | (Miller and Mekalanos, 1988)               |
| <i>V. cholerae</i> strains                        |                                                                                                                                                             |                                            |
| AC51                                              | spontaneous Sm <sup>r</sup> mutant of <i>V. cholerae</i> C6709-1 (O1 El Tor Ogawa, clinical isolate from Peru), <i>hapR</i> <sup>+</sup> , Sm <sup>r</sup>  | (Wachsmuth et al., 1993)                   |
| AC53                                              | spontaneous Sm <sup>r</sup> mutant of <i>V. cholerae</i> E7946 (O1 El Tor Inaba, clinical isolate from Bahrain), <i>hapR</i> <sup>+</sup> , Sm <sup>r</sup> | (Miller et al., 1989) (Vance et al., 2003) |
| AC53res                                           | insertion of <i>res-neo-sacB-res</i> in <i>lacZ</i> of AC53                                                                                                 | This study                                 |
| AC53res1                                          | insertion of <i>res1-neo-sacB-res1</i> in <i>lacZ</i> of AC53                                                                                               | This study                                 |
| AC53 <i>lacZ</i>                                  | insertion of a pGP704 derivative in <i>lacZ</i> of AC53                                                                                                     | This study                                 |
| $\Delta$ VC0201                                   | deletion of VC0201 in AC53                                                                                                                                  | (Lombardo et al.)                          |
| $\Delta$ <i>tcpA</i>                              | deletion of <i>tcpA</i> in AC53 using pHT3                                                                                                                  | This study                                 |
| $\Delta$ VC612                                    | deletion of VC0612 leaving AA: MACG                                                                                                                         | This study                                 |
| $\Delta$ VC612-3                                  | double deletion of VC0612 and VC0613 leaving AA: MSACG                                                                                                      | This study                                 |
| $\Delta$ VC1926                                   | deletion of VC1926 in AC53 leaving AA: MPWKP                                                                                                                | This study                                 |
| $\Delta$ VCA0601                                  | deletion of VCA0601 in AC53 leaving AA:<br>VRRTVVRSCRQRQQLQPAVLMRLKEKSMAS                                                                                   | This study                                 |
| $\Delta$ VCA0686                                  | deletion of VCA0686 in AC53 in AC53 leaving AA: MPWDS                                                                                                       | This study                                 |
| $\Delta$ VCA0744                                  | deletion of VCA0744 in AC53 leaving AA: MTACE                                                                                                               | This study                                 |
| $\Delta$ VCA0920                                  | deletion of VCA0920 in AC53 leaving AA: MMAC                                                                                                                | This study                                 |
| $\Delta$ VCA0980                                  | deletion of VCA0980 in AC53 leaving AA: MCA                                                                                                                 | This study                                 |
| $\Delta$ VC1593- $\Delta$ VC2697- $\Delta$ VC2370 | triple deletion in AC53 of VC1593 leaving AA: MMACPRC, of VC2697 leaving AA: MVNRACADR and of VC2370 leaving AA: MH                                         | This study                                 |
| Plasmids                                          |                                                                                                                                                             |                                            |
| pMMB67EH                                          | IncQ broad-host-range cloning vector, Ap <sup>r</sup>                                                                                                       | (Morales et al., 1991)                     |
| pCVD442                                           | <i>oriR6K mobRP4 sacB</i> , Ap <sup>r</sup>                                                                                                                 | (Donnenberg and Kaper, 1991)               |
| pGP704                                            | <i>oriR6K mobRP4</i> , Ap <sup>r</sup>                                                                                                                      | (Miller and Mekalanos, 1988)               |
| pRes                                              | pGP704 with <i>lacZ::res-neo-sacB-res</i> , Ap <sup>r</sup> , Kn <sup>r</sup>                                                                               | (Osorio et al., 2005)                      |
| pRes1                                             | pGP704 with <i>lacZ::res1-neo-sacB-res1</i> , Ap <sup>r</sup> , Kn <sup>r</sup>                                                                             | (Osorio et al., 2005)                      |
| pIVET5nlibrary                                    | library of random <i>V. cholerae</i> genomic fragments ligated into pGOA1193, pGOA1194 and pGOA1195 to create transcriptional fusions to <i>tnpR</i>        | (Osorio et al., 2005)                      |
| pSL481                                            | pIVET5 <i>ctxA::mpR</i> <sup>135</sup> , Ap <sup>r</sup>                                                                                                    | (Lee et al., 1999)                         |

|                             |                                                              |                           |
|-----------------------------|--------------------------------------------------------------|---------------------------|
| pSL479                      | pIVET5 <i>tcpA::mpR</i> <sup>135</sup> , Ap <sup>f</sup>     | (Lee et al., 1999)        |
| pHT3                        | <i>ΔtcpA</i> in pCVD442                                      | (Thelin and Taylor, 1996) |
| pVC0201                     | VC0201 of AC53 in pMMB67EH, Ap <sup>f</sup>                  | This study                |
| pVC0612                     | VC0612 of AC53 in pMMB67EH, Ap <sup>f</sup>                  | This study                |
| pVC1926                     | VC1926 of AC53 in pMMB67EH, Ap <sup>f</sup>                  | This study                |
| pVCA0601                    | VCA0601 of AC53 in pMMB67EH, Ap <sup>f</sup>                 | This study                |
| pVCA0686                    | VCA0686 of AC53 in pMMB67EH, Ap <sup>f</sup>                 | This study                |
| pVCA0744                    | VCA0744 of AC53 in pMMB67EH, Ap <sup>f</sup>                 | This study                |
| pVCA0920                    | VCA0920 of AC53 in pMMB67EH, Ap <sup>f</sup>                 | This study                |
| pVCA0980                    | VCA0980 of AC53 in pMMB67EH, Ap <sup>f</sup>                 | This study                |
| pGPVC1593-<br>VC2370-VC2697 | VC1593, VC2370 and VC2697 of AC53 in pGP704, Ap <sup>f</sup> | This study                |
| pΔVC0612                    | ΔVC0612 of AC53 in pCVD442, Ap <sup>f</sup>                  | This study                |
| pΔVC0612-3                  | ΔVC0612-3 of AC53 in pCVD442, Ap <sup>f</sup>                | This study                |
| pΔVC1593                    | ΔVC1593 of AC53 in pCVD442, Ap <sup>f</sup>                  | This study                |
| pΔVC1926                    | ΔVC1926 of AC53 in pCVD442, Ap <sup>f</sup>                  | This study                |
| pΔVC2697                    | ΔVC2697 of AC53 in pCVD442, Ap <sup>f</sup>                  | This study                |
| pΔVC2370                    | ΔVC2370 of AC53 in pCVD442, Ap <sup>f</sup>                  | This study                |
| pΔVCA0601                   | ΔVCA0601 of AC53 in pCVD442, Ap <sup>f</sup>                 | This study                |
| pΔVCA0686                   | ΔVCA0686 of AC53 in pCVD442, Ap <sup>f</sup>                 | This study                |
| pΔVCA0744                   | ΔVCA0744 of AC53 in pCVD442, Ap <sup>f</sup>                 | This study                |
| pΔVCA0920                   | ΔVCA0920 of AC53 in pCVD442, Ap <sup>f</sup>                 | This study                |
| pΔVCA0980                   | ΔVCA0980 of AC53 in pCVD442, Ap <sup>f</sup>                 | This study                |

**Table S2: Oligonucleotides used for PCR**

| name             | sequence <sup>a</sup>                   |
|------------------|-----------------------------------------|
| VC0612-SacI-up   | TTT <u>GAGCTCG</u> CAATATCGCAGTATTCAGTA |
| VC0612-SphI-up   | TATGCATGCCATTGTGCTTTCCTTTTAAACCA        |
| VC0612-SphI-down | TATGCATGCGGTTAATCCATTTTCGGGCACT         |
| VC0612-XbaI-down | TTATCTAGAATAAAGTTGCCTTTTTCATCGA         |
| VC0613-SacI-up   | AAAGAGCTCACGGGGAGGAGAACCAATGAA          |
| VC0613-SphI-up   | AAAGCATGCACTCATAAACCATCCTTATACA         |
| VC1593-SacI-up   | TTT <u>GAGCTCT</u> CATACGGCGGGTTCTCT    |
| VC1593-SphI-up   | TTTGCATGCCATCATTCTTTTATTATCATCACAT      |
| VC1593-SphI-down | TTTGCATGCCAAGATGTTAAAAAACAACCT          |
| VC1593-XbaI-down | TAT <u>TCTAGAT</u> AGGGACACAAACGTATGCT  |
| VC1926-SacI-up   | AAAGAGCTCCAAGCGGCGAAACTGGCAGT           |
| VC1926-NcoI-up   | AATCCATGGCATGGTTAGTCCATATTGAGAGGT       |
| VC1926-NcoI-down | AAACCATGGAAACCTGAAACCATCCC GCGTT        |
| VC1926-Xba-down  | AAATCTAGACACCAAAGCGACCTTGAT             |
| VC2697-SacI-up   | TTAGAGCTCACTTCGTTGGTGTTCATGTT           |

|                   |                                         |
|-------------------|-----------------------------------------|
| VC2697-SphI-up    | TTAGCATGCACGATTACCCATAAAATCCGTT         |
| VC2697-SphI-down  | AAAGCATGCGCTGATCGGTAAACAAAAAGTGT        |
| VC2697-XbaI-down  | AATTCTAGATCGTGAAAAGGGTTGGGCT            |
| VC2370-SacI-up    | TTTGAGCTCAGCAGCAGAGTATTCAAGCG           |
| VC2370-SphI-up    | TTAGCATGCATTACAGCGGTGTTATTGA            |
| VC2370-SphI-down  | AAAGCATGCCTAAAACCTGTGCGGTTTCGCC         |
| VC2370-XbaI-down  | AAATCTAGAAATAAACGTGGTTTTGTGCGC          |
| VCA0601-SacI-up   | ATTGAGCTCTGGCACCATCCACCAAAA             |
| VCA0601-NheI-up   | TTTGCTAGCCATACTCTTCTCCTTAAGCCGCA        |
| VCA0601-NheI-down | AATGCTAGCTAGTGGAAGAGGCAATAGGA           |
| VCA0601-XbaI-down | AATTCTAGATGATAGGCATAAAAGACATACGA        |
| VCA0686-SacI-up   | TTTGAGCTCTTCTGCGGTATACATGGGCA           |
| VCA0686-NcoI-up   | TTTCCATGGCATGGTCAAACCTTATTATTGAGT       |
| VCA0686-NcoI-down | TTTCCATGGGATTCTTAGGAGACATCACCGT         |
| VCA0686-XbaI-down | TTTCTAGACTTAGGTGCTTTATACAACCTCTT        |
| VCA0744-SacI-up   | TTAGAGCTCACCATTACAGCGGTAAGTATGTT        |
| VCA0744-SphI-up   | TTAGCATGCAGTCATGTTCTATTCCCTTATGGTT      |
| VCA0744-SphI-down | TTTGCATGCGAGTAATTTTCTCTCTCCATAA         |
| VCA0744-XbaI-down | TTATCTAGAGCGGCCTCTTTTCTTGATGGTT         |
| VCA0920-SacI-up   | AAAGAGCTCCAACAATCTATTGAGTGTGACAA        |
| VCA0920-SphI-up   | AAAGCATGCCATCATGGCGAAGCGTTTATCCT        |
| VCA0920-SphI-down | AATGCATGCTAAAGTAGAAAAAGCAAAGAGGA        |
| VCA0920-XbaI-down | AAATCTAGAGAAATGATGAAAGCTCTCGGT          |
| VCA0980-SacI-up   | AAAGAGCTCAGGTGAAGGGTTGGCTGAAA           |
| VCA0980-SphI-up   | AAAGCATGCCATGTGACCTCCATTAAACCAGA        |
| VCA0980-SphI-down | AATGCATGCTAAATACAAAGAATTTCAAGCTGT       |
| VCA0980-XbaI-down | AAATCTAGAGCAGCGCGTTCATAAACACT           |
| VC0201-5'-XbaI    | TTTCTAGATTGTCCGTATTCTTGGATGA            |
| VC0201-3'-SphI    | TTAGCATGCAGACGAACATTCCATAGACTCA         |
| VCA0920-5'-XbaI   | TATTCTAGACAAAACCTCGCCACACAGGAT          |
| VCA0920-3'-SphI   | TTTGCATGCTTTTTCTACTTTAGCGAGCGA          |
| VCA0980-5'-XbaI   | TTTCTAGAGCCTTCTGGTTTAATGGAGGT           |
| VCA0980-3'-SphI   | TTTGCATGCCTTGAGTCACAGCTTGAAATTCT        |
| VC1593-3'-KpnI    | TTTGGTACCTCAGCACTGAATCGGTAAATCT         |
| VC2370-5'-KpnI    | TTAGGTACCAGGAGAATGCATGCCTGAATTTCTCTCTGA |
| VC2370-3'-EcoRI   | TTTGAATTCCTAGTGGTTTGGTTGATAAATTGAGGT    |
| VC2697-5'-EcoRI   | AAAGAATTCAAAGGAACGGATTTATGGTGAA         |
| VC2697-3'-XbaI    | TTTCTAGATTTTTGTTTACCGATCAGCAATCA        |
| VC0612-5'-XbaI    | AAATCTAGAAAAGGAAAGCACAAATGAAATACGG      |
| VC0612-3'-SphI    | AAAGCATGCCCGAAAATGGATTAACCTAGA          |
| VC1926-5'-EcoRI   | TTAGAATTCACACCTCTCAATATGGACTA           |

|                     |                                             |
|---------------------|---------------------------------------------|
| VC1926-3'-BamHI     | TTT <u>GGATCC</u> TTTAATCTGAGACCTAGACT      |
| VCA0601-5'-EcoRI    | TTAG <u>AATTC</u> GATATTTGGCATTGAGAGCA      |
| VCA0601-3'-BamHI    | TTT <u>GGATCC</u> TATTGCCTCTTTCCACTAA       |
| VCA0686-5'-XbaI     | TTT <u>CTAGACT</u> CAATAATAAGGTTTGACCAT     |
| VCA0686-3'-SphI     | TTT <u>GATGCGG</u> TGATGTCTCCTAAGAATCTT     |
| VCA0744-5'-EcoRI    | TTAG <u>AATTC</u> CATAAGGAATAGAACATGACT     |
| VCA0744-3'-BamHI    | TTT <u>GGATCC</u> TTTATGGAGAGAGAAAAATTACTCT |
| IVET-1              | AAATCGTACGCCGACTAGAATGTC                    |
| IVET-2              | ACGTCACCTTCCTCCACCTTCATC                    |
| IVET-3              | CCTTCATCCTCAGCAAGTCCA                       |
| VC1593-qF           | CATTATCGGGATGATAGCGGTC                      |
| VC1593-qR           | CAACTGTGGAGTCAATGAGTGG                      |
| VC1926-qF           | CTTACCCGGTTTAAGTGGACAG                      |
| VC1926-qR           | GTACCGTGTCAATCAACCTCTC                      |
| VCA0601-qF          | CCTGCTATCACTGATGCTGTTG                      |
| VCA0601-qR          | CACACTGATACCAAGCACTAAGG                     |
| VCA0744-qF          | GTGGTGTGGAATAAAGAGACGG                      |
| VCA0744-qR          | TACCTGAGAAGTAAGGGTCGAG                      |
| VC0612-qF           | GGTTACTCCTTCTATCACTCACC                     |
| VC0612-qR           | GATAGACCAGAAATCGCCTGTC                      |
| VCA0686-qF          | CCTACTCTAGCTTCTGTATGCTGG                    |
| VCA0686-qR          | GAATGATGCTGATCAGTGAGCC                      |
| VCA0980-qF          | CTTAGAGACAGTGAAATCGGCG                      |
| VCA0980-qR          | TGCCTGATCTAGGGTCAGATAC                      |
| VC0620-qF           | GCGTACAACCACCGACTTTATC                      |
| VC0620-qR           | CTTACCGTCAGACCACTTAAC                       |
| RPB2FD <sup>b</sup> | CTGTCTCAAGCCGGTTACAA                        |
| RPB2RV <sup>b</sup> | TTTCTACCAGTGCAGAGATGC                       |

<sup>a</sup> restriction sites are underlined

<sup>b</sup> oligonucleotides for *rpoB* according to (Quinones et al., 2005)

**Table S3: Comparison of the two pond water samples used in this study.**

Analysis was performed by the Chemical Analysis Laboratory/Center for Applied Isotope Studies at the University of Georgia. Tested, but below detection (>10 ppt) in both samples: Al, B, Ba, Cd, Co, Cr, Cu, Fe, Mn, Mo, Ni, Pb, Zn

| <b>element/ anion/<br/>cation</b> | <b>pond water,<br/>Bangladesh<br/>(ppm)</b> | <b>pond water,<br/>Boston<br/>(ppm)</b> |
|-----------------------------------|---------------------------------------------|-----------------------------------------|
| Na                                | 24.7                                        | 55.2                                    |
| K                                 | 7.1                                         | 1.1                                     |
| Ca                                | 32.1                                        | 17.5                                    |
| Mg                                | 6.3                                         | 5.8                                     |
| Si                                | 1.8                                         | below detection                         |
| Sr                                | 0.12                                        | 0.12                                    |
| P                                 | 0.2                                         | 0.4                                     |
| NO <sub>2</sub> <sup>-</sup>      | 1.3                                         | 0.5                                     |
| NH <sub>4</sub> <sup>+</sup>      | 0.1                                         | 0.1                                     |



# Fig. S1

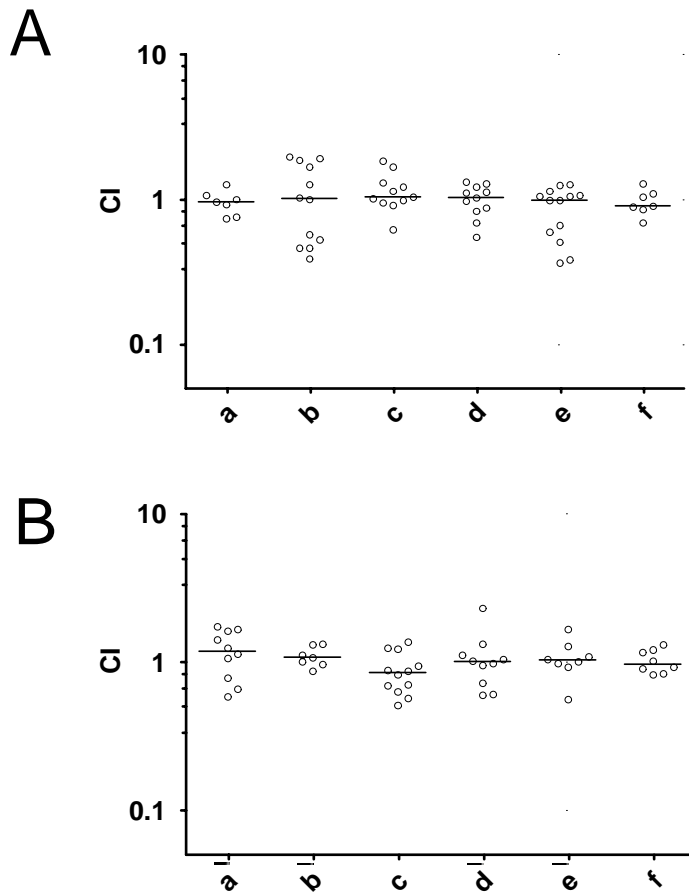

**Figure S1. Late gene mutants not attenuated *in vivo*.**

Results are shown as the CI using the infant mouse model for *in vitro* passaged bacteria (A) or *in vivo* passaged bacteria (B). Each circle represents the CI from a single assay. The horizontal bars indicate the median of each data set.

Abbreviations stand for the following competitions: a)  $\Delta V C 1926 / A C 53 r e s 1$ ; b)  $\Delta V C A 0744 / A C 53 r e s 1$ ; c)  $\Delta V C 0612-3 / A C 53 r e s 1$ ; d)  $\Delta V C A 0686 / A C 53 r e s 1$ ; e)  $\Delta V C A 0601 / A C 53 r e s 1$ ; f)  $\Delta V C 1593-\Delta V C 2697-\Delta V C 2370 / A C 53 r e s 1 / A C 53 r e s 1$ .

## Supplemental References

Donnenberg, M.S., and Kaper, J.B. (1991). Construction of an *eae* deletion mutant of enteropathogenic *Escherichia coli* by using a positive-selection suicide vector. *Infect. Immun.* 59, 4310–4317.”

Hanahan, D. (1983). Studies on transformation of *Escherichia coli* with plasmids. *J. Mol. Biol.* 166, 557–580.

Kolter, R., Inuzuka, M., and Helinski, D.R. (1978). Trans-complementation-dependent replication of a low molecular weight origin fragment from plasmid R6K. *Cell* *15*, 1199–1208.

Miller, V.L., and Mekalanos, J.J. (1988). A novel suicide vector and its use in construction of insertion mutations: osmoregulation of outer membrane proteins and virulence determinants in *Vibrio cholerae* requires *toxR*. *J. Bacteriol.* *170*, 2575–2583.

Morales, V.M., Backman, A., and Bagdasarian, M. (1991). A series of wide-host-range low-copy-number vectors that allow direct screening for recombinants. *Gene* *97*, 39–47.

Theelin, K.H., and Taylor, R.K. (1996). Toxin-coregulated pilus, but not mannose-sensitive hemagglutinin, is required for colonization by *Vibrio cholerae* O1 El Tor biotype and O139 strains. *Infect. Immun.* *64*, 2853–2856.

Wachsmuth, I.K., Evins, G.M., Fields, P.I., Olsvik, O., Popvic, T., Bopp, C.A., Wells, J.G., Carrillo, C., and Blake, P.A. (1993). The molecular epidemiology of cholera in Latin America. *J. Infect. Dis.* *167*, 621–626.
